# Supplementary material for: Mucosal vaccination with pili from Group A Streptococcus expressed on Lactococcus lactis generates protective immune responses
Source: PubMed Central journal article supplement (PMC5543120; doi:10.1038/s41598-017-07602-0), 2017-08-03
Supplement: 41598_2017_7602_MOESM1_ESM.pdf [file 41598_2017_7602_MOESM1_ESM.pdf]

## Supplementary Data

### **Mucosal vaccination with pili from Group A Streptococcus expressed on *Lactococcus lactis* generates protective immune responses**

Jacelyn M. S. Loh<sup>1,2</sup>, Natalie Lorenz<sup>1,2</sup>, Catherine J-Y. Tsai<sup>1,2</sup>, Adrina Hema J. Khemlani<sup>1,2</sup>, and Thomas Proft<sup>1,2\*</sup>

<sup>1</sup>Department of Molecular Medicine & Pathology, School of Medical Sciences, University of Auckland, Auckland 1023, New Zealand.

<sup>2</sup>Maurice Wilkins Centre for Molecular Biodiscovery, Auckland 1023, New Zealand.

\*corresponding author email: [t.proft@auckland.ac.nz](mailto:t.proft@auckland.ac.nz)

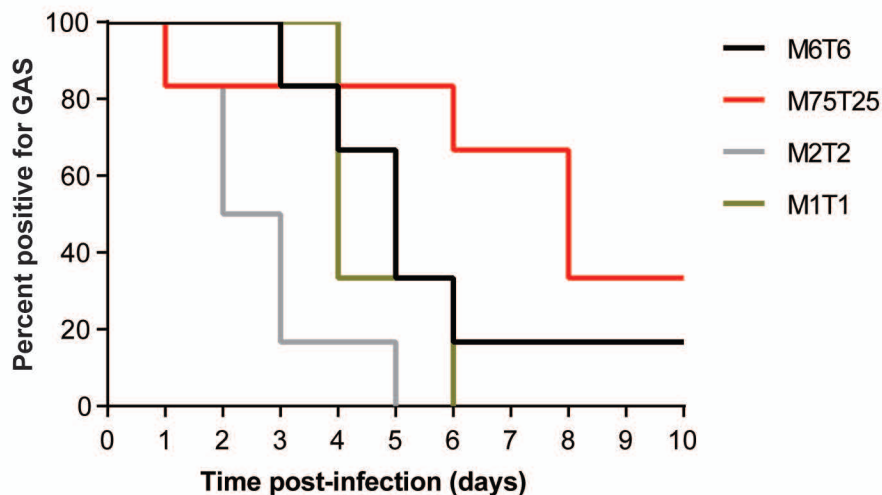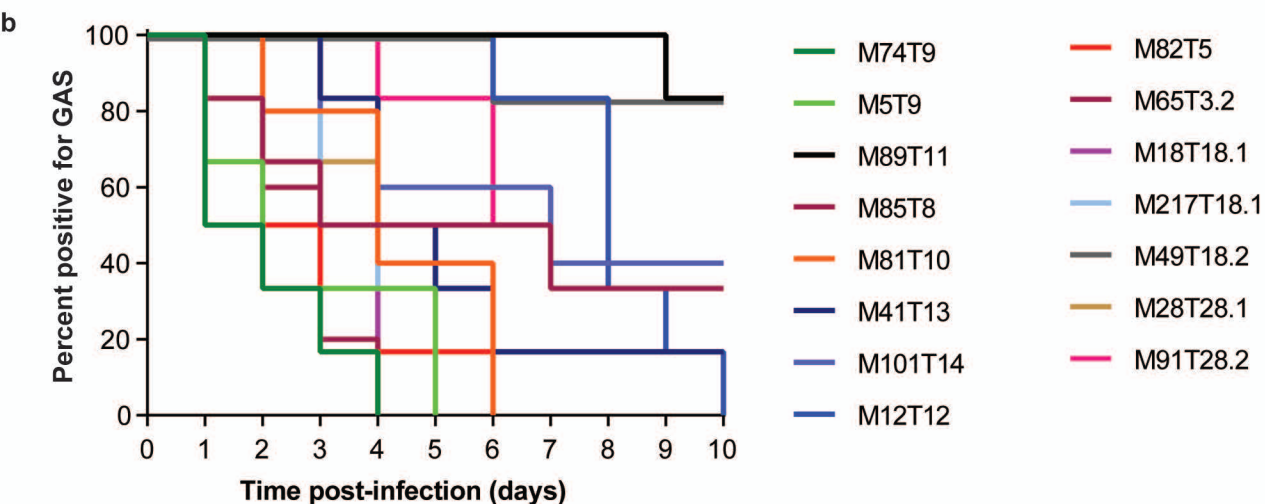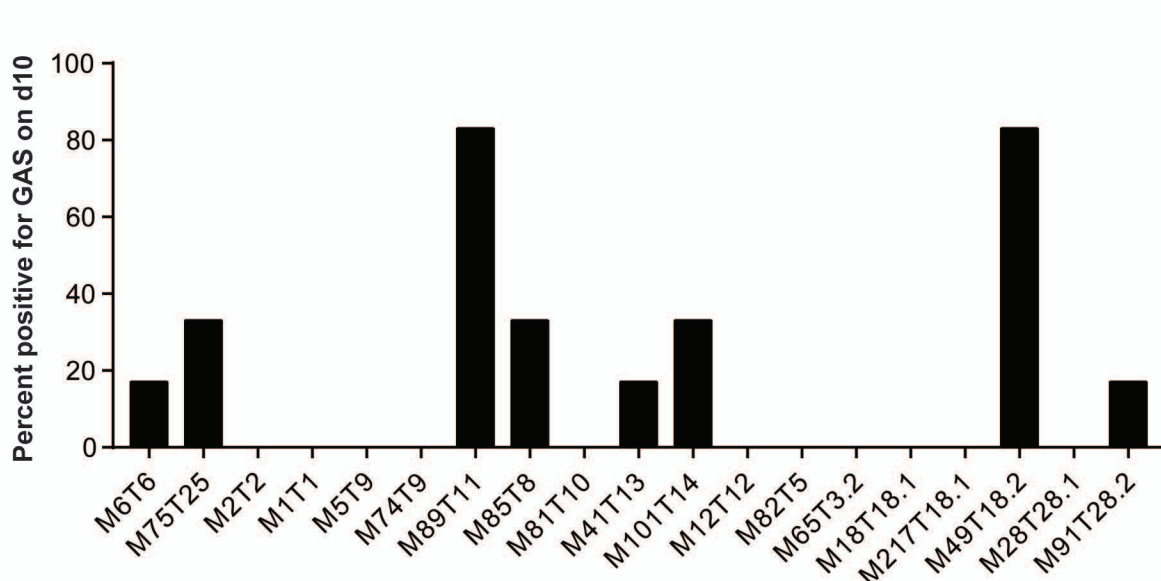

### Supplementary Figure 1. Mouse infection studies.

FVB/n mice aged 10-12 weeks were challenged intranasally with  $10^8$  CFU of GAS (n=6). Strain information can be found in Table S1. Mice were monitored daily for nasal shedding of bacteria by culture on Columbia horse-blood agar plates. Graphs show the percentage of mice with a positive  $\beta$ -hemolytic culture of at least 1 CFU. A) Strains belonging to the FCT-1, 2, 5, and 6 types. B) Strains belonging to the FCT-3, 4, 7 or 8 types. C) Percentage of mice positive for GAS on day 10.

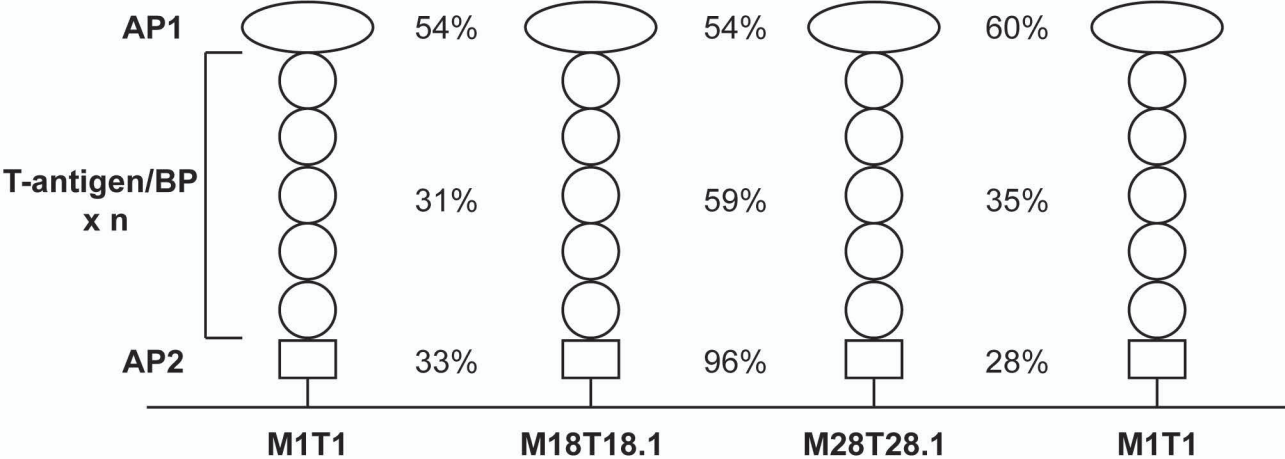

**Supplementary Figure 2. Amino acid sequence identities between individual pilus proteins from different strains.**

Amino acid sequences of mature proteins (from signal peptide cleavage site to sortase motif) were analysed for sequence identity using CLUSTALW.

**Supplementary Table 1. Strains used in this study**

| <b>Name</b> | <b>Strain</b>    | <b>FCT-type</b> | <b>Origin</b> |
|-------------|------------------|-----------------|---------------|
| M6T6        | MGAS10394        | 1               | ATCC          |
| M1T1        | SF370            | 2               | ATCC          |
| M5T9        | 90/306 (LN85)    | 3               | ESR           |
| M41T13      | 10028 (LN79)     | 3               | ESR           |
| M12T12      | 94/354 (LN97)    | 3               | ESR           |
| M18T18.1    | MGAS8232         | 3               | ESR           |
| M217T18.1   | 11574 (LN7)      | 3               | ESR           |
| M49T18.2    | G (LN57)         | 3               | ESR           |
| M89T11      | C (LN53)         | 4               | ESR           |
| M82T5       | 9893 (LN3)       | 4               | ESR           |
| M28T28.1    | MGAS6180         | 4               | ESR           |
| M91T28.2    | GAS09212 (LN115) | 4               | ESR           |
| M85T8       | GAS13256 (LN186) | 3/4             | ESR           |
| M65T3.2     | GAS1142 (LN127)  | 3/4             | ESR           |
| M74T9       | GAS13345 (LN197) | 3/4/7           | ESR           |
| M81T10      | GAS10233 (LN122) | 3/4/7           | ESR           |
| M101T14     | GAS09426 (LN117) | 3/4/7           | ESR           |
| M2T2        | MGAS10270        | 6               | ATCC          |
| M75T25      | GAS13232 (LN182) | 9               | ESR           |

ATCC, American Type Culture Collection. ESR, Institute of Environmental Science and Research New Zealand.

**Supplementary Table 2. Primers used in this study**

| <b>Product name</b> | <b>Primer</b>     | <b>DNA sequence (5'–3')</b>                     |
|---------------------|-------------------|-------------------------------------------------|
| PilM18              | PilM18.fw         | <b>gcggatcc</b> gaccatatacacggttcagga           |
|                     | PilM18_M28.rv     | cgg <b>ctgcag</b> tcttatatggtacaaaaacctatcagc   |
| PilM28              | PilM28.fw         | <b>gcggatcc</b> tcttgacaataacgtgtaagctc         |
|                     | PilM18_M28.rv     | cgg <b>ctgcag</b> tcttatatggtacaaaaacctatcagc   |
| AP1_M1              | Spy0125.fw        | <b>ggatcca</b> agactgttttggttag                 |
|                     | Spy0125_LPXTG.rev | <b>ctcgag</b> ctaaccagttctggcaaggctctttattatttc |
| AP1_M18             | spyM18_0126T53F   | <b>ggatcc</b> actaaaaaacgtcagtcattattag         |
|                     | spyM18_0126I368R  | <b>gaattc</b> ttaataataggagcctgtttatcttc        |
| AP1_M28             | spyM28_0107.fw    | ctagg <b>gatcc</b> gctcacgaattggttgagg          |
|                     | spyM28_0107.rv    | ctagg <b>aattc</b> ttaaaaaccagttggtgggacaag     |
| T1                  | spy0128.fw        | <b>cgggatcc</b> gctacaacagttcacgg               |
|                     | spy0128.rv        | <b>cggaattc</b> tattcaagactttttatttg            |
| T18.1               | spyM18_0128.fw    | <b>cgggatcc</b> gagacagcaggagtgattg             |
|                     | spyM18_0128.rv    | <b>cggaattc</b> tattcgtcagtagattg               |
| T28.1               | spyM28_0109.fw    | <b>gcggatcc</b> gagacggcaggagtgtccgaaaatg       |
|                     | spyM28_0109.rv    | <b>cggaattc</b> ttaaacaccagttggaactgagtg        |
| T11                 | M89_FctAC.fw      | <b>gcggatcc</b> tctttagttgttaaaaagagg           |
|                     | M89_FctAC.rev     | <b>gcgaattc</b> aagatctagttggaactgagtgac        |
| AP2_M1              | Spy0130.fw        | <b>ggatcc</b> gagaacctcactgcaagc                |
|                     | Spy0130.rev       | <b>gaattc</b> ttaaccattacgtttttctg              |
| AP2_M18             | spyM18_0130.fw    | <b>cgggatcca</b> aagacagcactgttc                |
|                     | spyM18_0130.rv    | <b>cggaattc</b> ttaggttttagggatgtcag            |
| AP2_M28             | spyM28_0111.fw    | ctagg <b>gatcca</b> aagacagcactgttcaaac         |
|                     | spyM28_0111.rv    | ctagg <b>aattc</b> tattcaccagctaattggtaatg      |

Restriction sites are shown in bold.
